# Supplementary material for: KLF7: a new candidate biomarker and therapeutic target for high-grade serous ovarian cancer
Source: Springer Nature journal article supplement (doi:10.1186/s13046-020-01775-9), 2020-11-30
Supplement: MOESM2 [file 18642072]

## Supplementary File 2

# **KLF7: A NEW CANDIDATE BIOMARKER AND THERAPEUTIC TARGET FOR HIGH-GRADE SEROUS OVARIAN CANCER**

De Donato *et al.*

This supplementary material includes

- Curated Ovarian Cancer datasets - KLF family

# KLF1

## Univariate

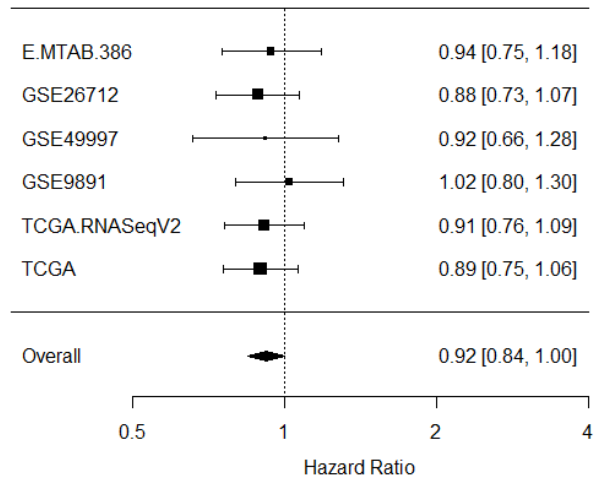

Pval: 0.04780519

## Multivariate (age, FIGO stage, residual tumour)

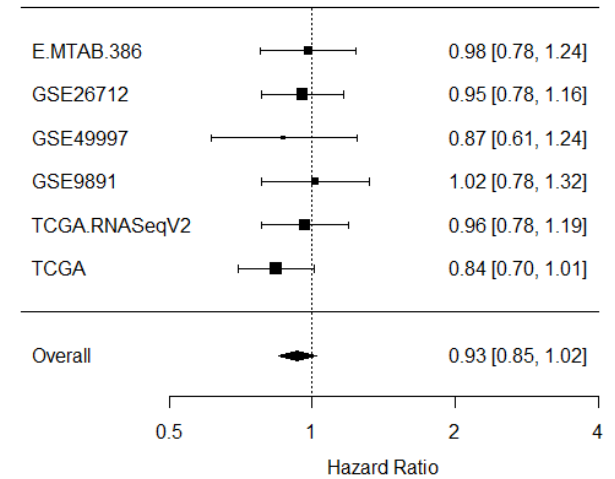

Pval: 0.1240095

# KLF2

## Univariate

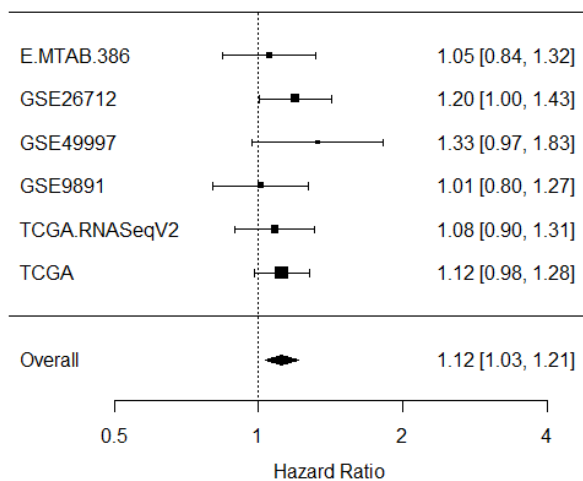

Pval: 0.004967524

## Multivariate (age, FIGO stage, residual tumour)

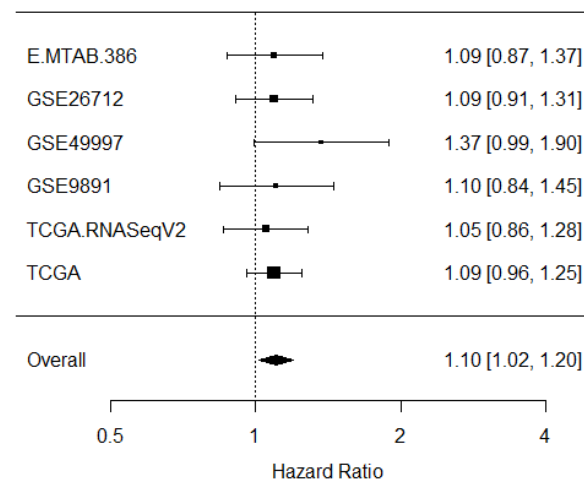

Pval: 0.01909106

# KLF3

## Univariate

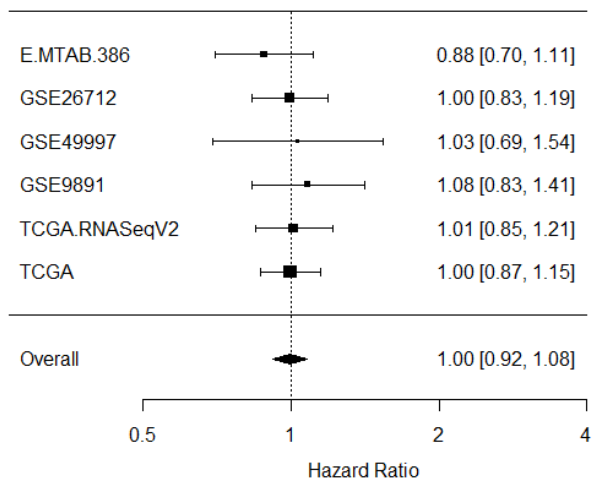

Pval: 0.9180043

## Multivariate (age, FIGO stage, residual tumour)

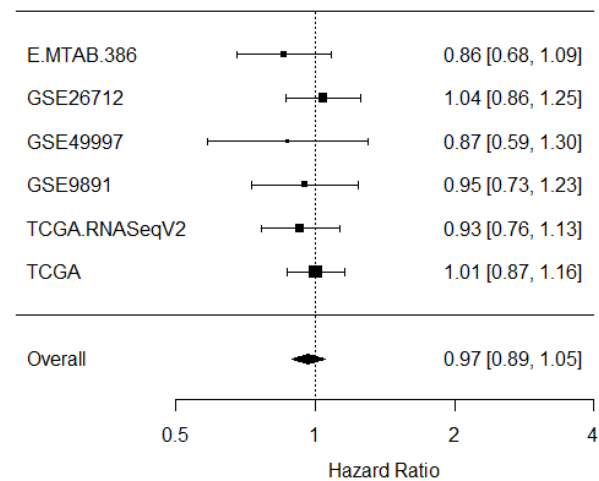

Pval: 0.4121924

# KLF4

## Univariate

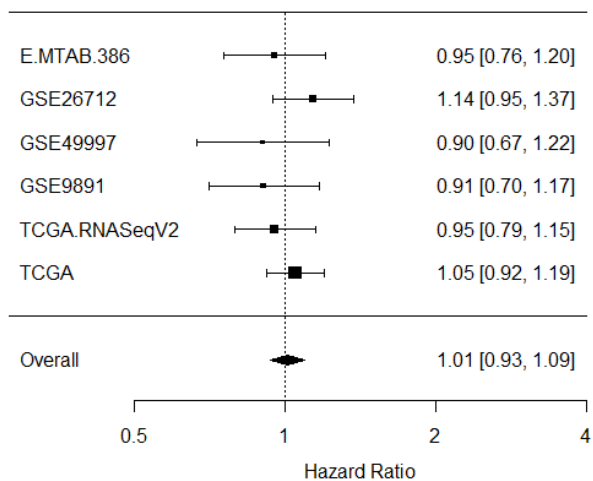

Pval: 0.8157031

## Multivariate (age, FIGO stage, residual tumour)

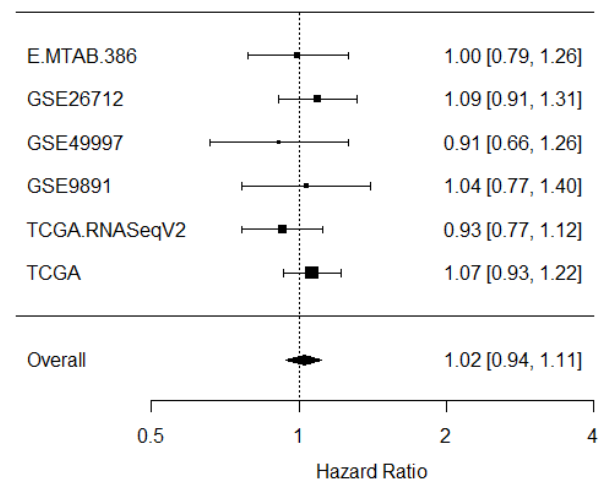

Pval: 0.5794065

# KLF5

## Univariate

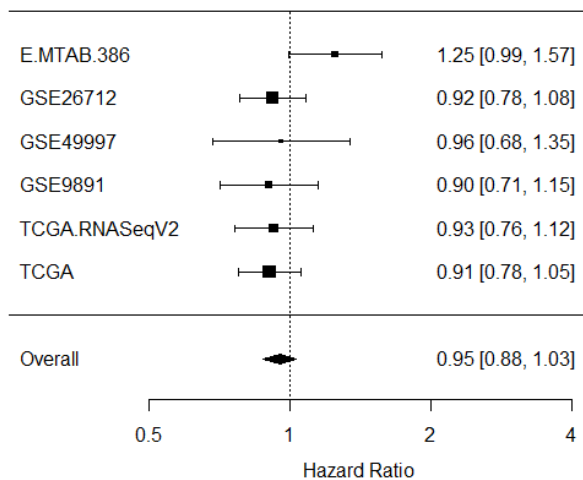

Pval: 0.2454189

## Multivariate (age, FIGO stage, residual tumour)

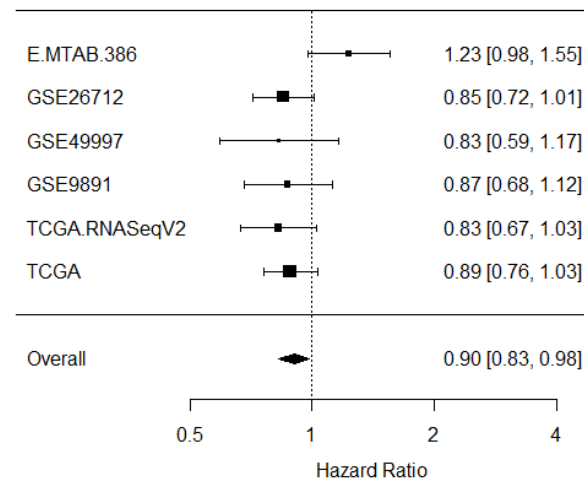

Pval: 0.01732922

# KLF6

## Univariate

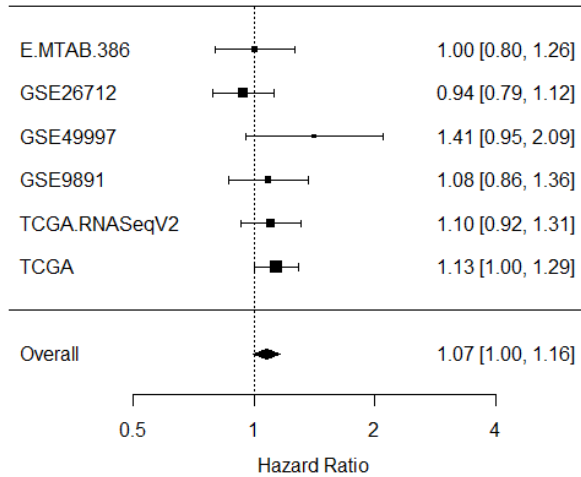

Pval: 0.06464532

## Multivariate (age, FIGO stage, residual tumour)

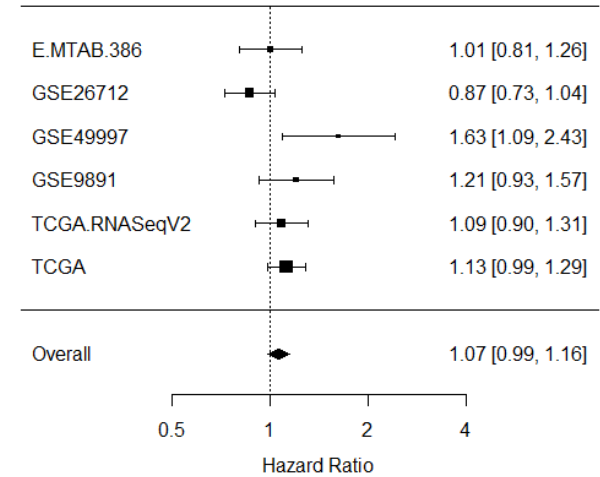

Pval: 0.09921779

# KLF7

## Univariate

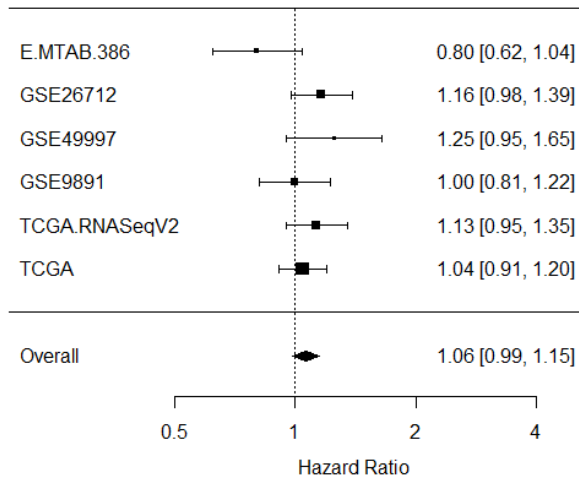

Pval: 0.1079501

## Multivariate (age, FIGO stage, residual tumour)

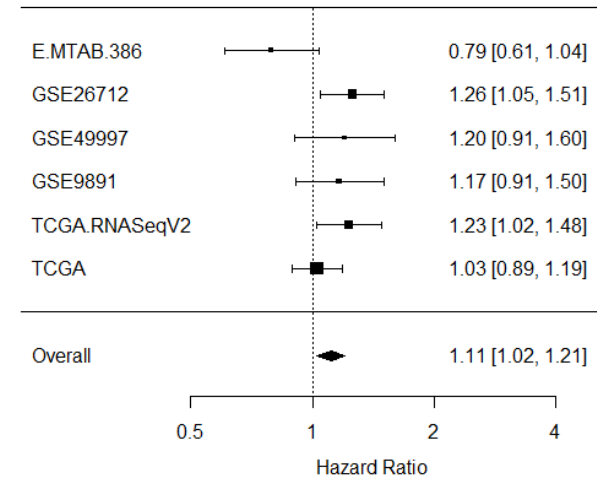

Pval: 0.01172062



# KLF8

## Univariate

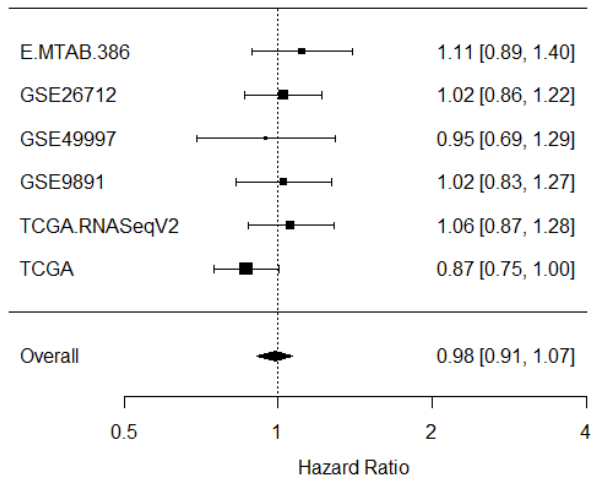

Pval: 0.6953746

## Multivariate (age, FIGO stage, residual tumour)

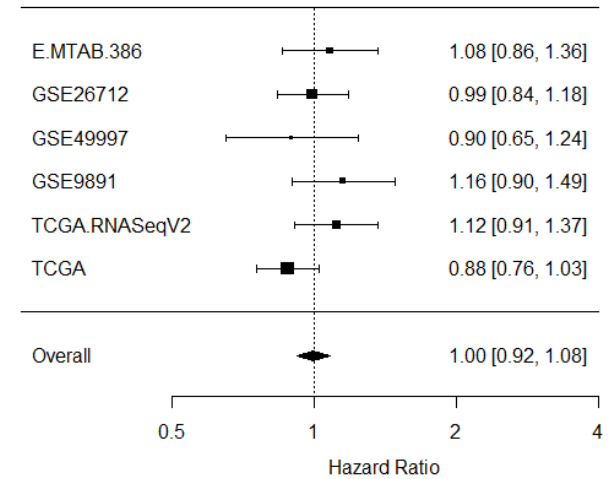

Pval: 0.9572073

# KLF9

## Univariate

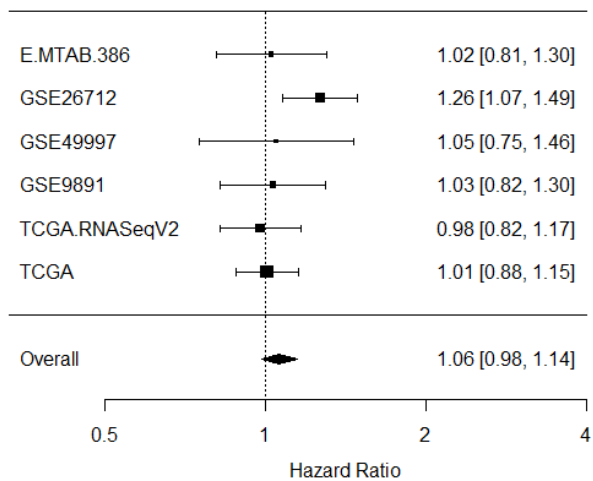

Pval: 0.1416893

## Multivariate (age, FIGO stage, residual tumour)

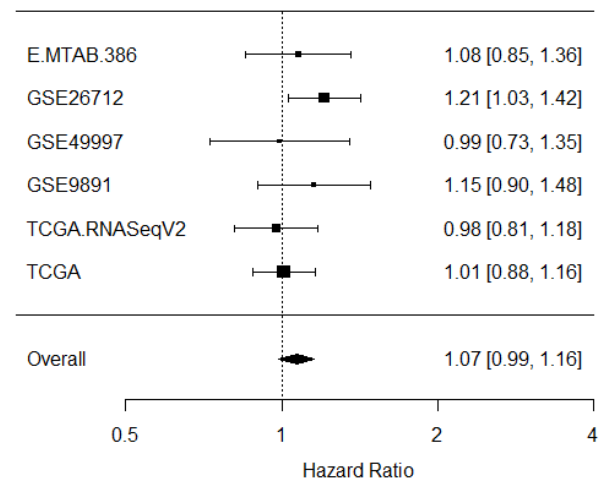

Pval: 0.09454739

# KLF10

## Univariate

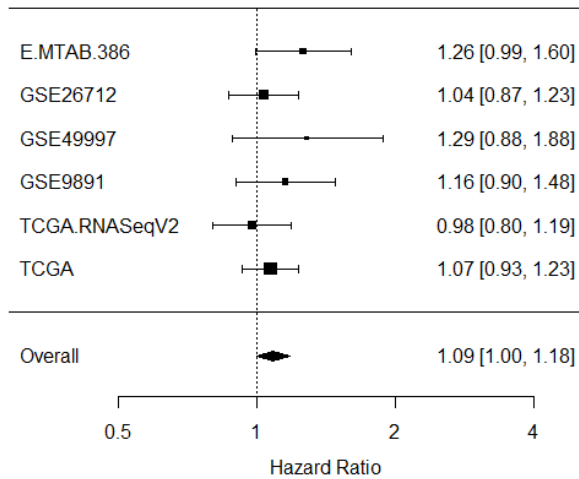

Pval: 0.05060688

## Multivariate (age, FIGO stage, residual tumour)

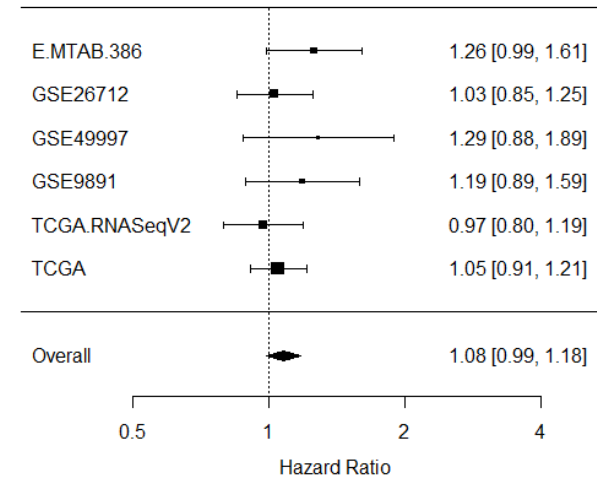

Pval: 0.08150034

# KLF11

## Univariate

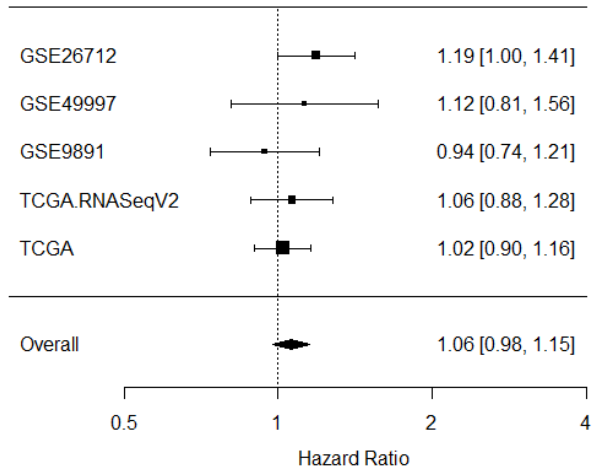

Pval: 0.1593252

## Multivariate (age, FIGO stage, residual tumour)

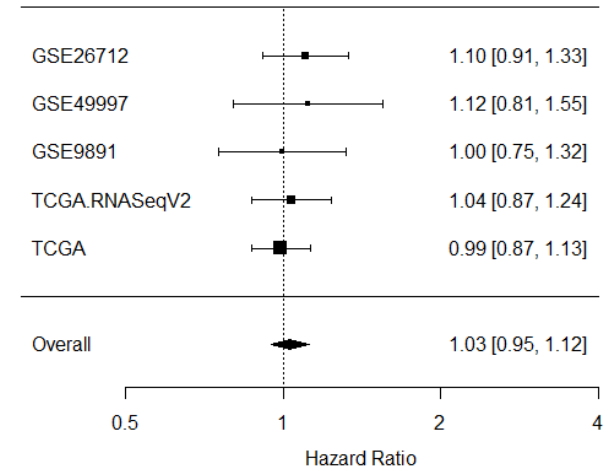

Pval: 0.466779

# KLF12

## Univariate

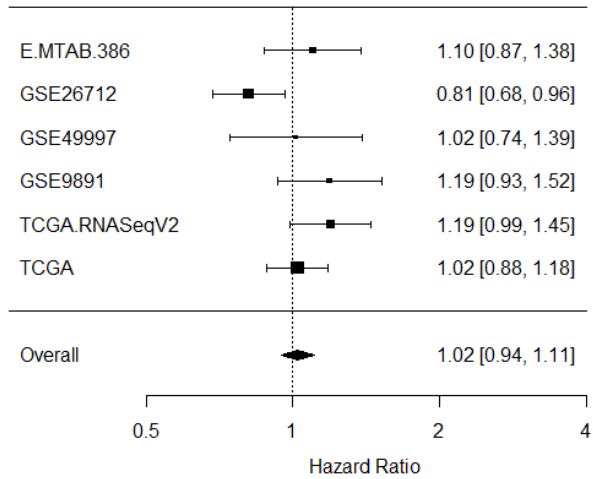

Pval: 0.5730336

## Multivariate (age, FIGO stage, residual tumour)

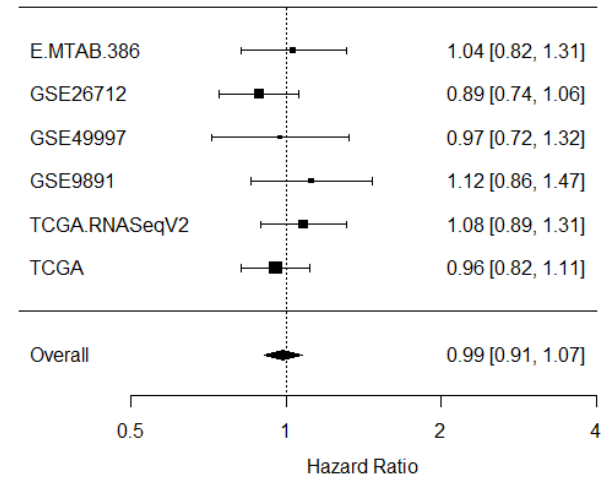

Pval: 0.7917701

# KLF13

## Univariate

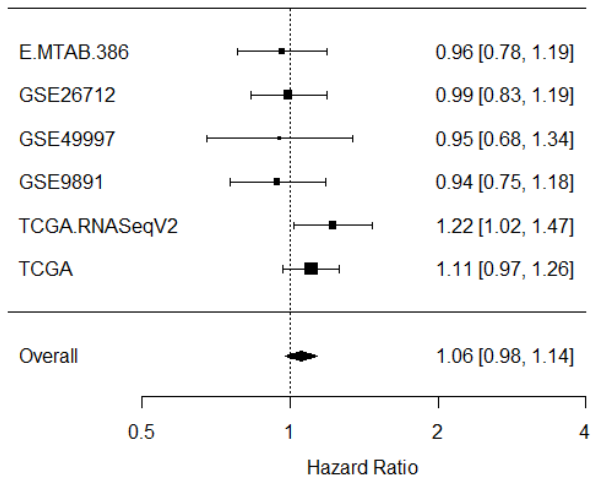

Pval: 0.1708605

## Multivariate (age, FIGO stage, residual tumour)

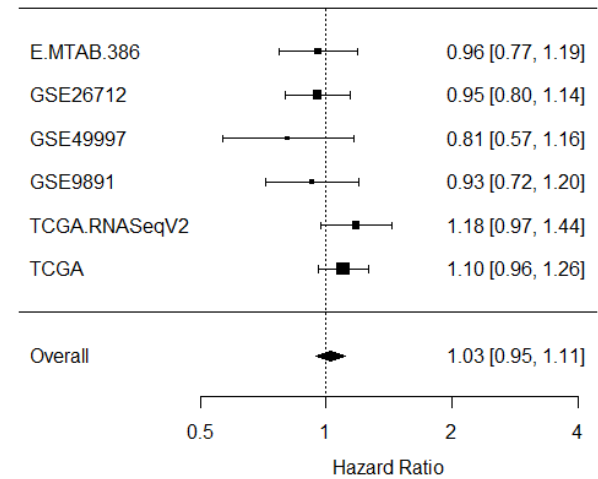

Pval: 0.5229142

# KLF14

## Univariate

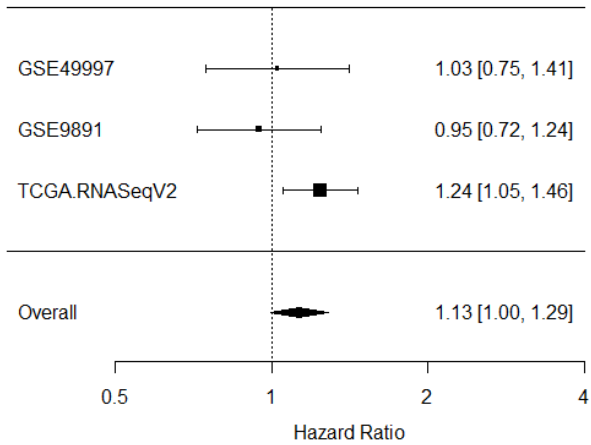

Pval: 0.05937618

## Multivariate (age, FIGO stage, residual tumour)

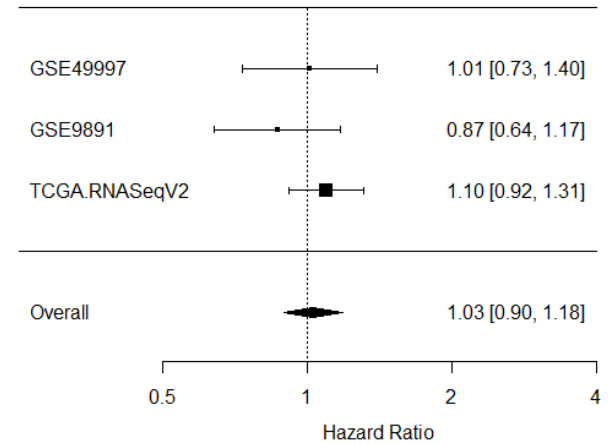

Pval: 0.6873131

# KLF15

## Univariate

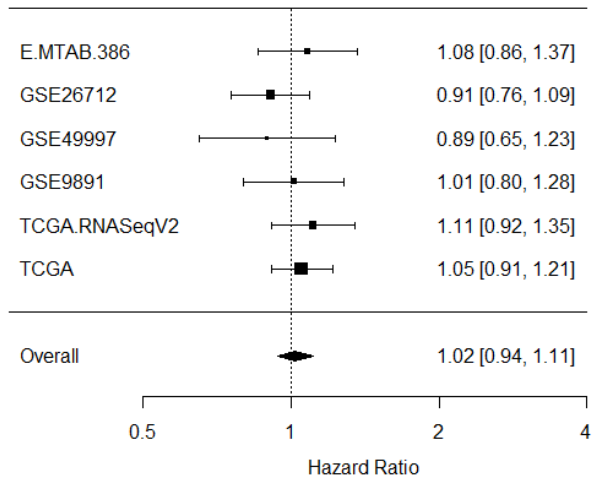

Pval: 0.6119663

## Multivariate (age, FIGO stage, residual tumour)

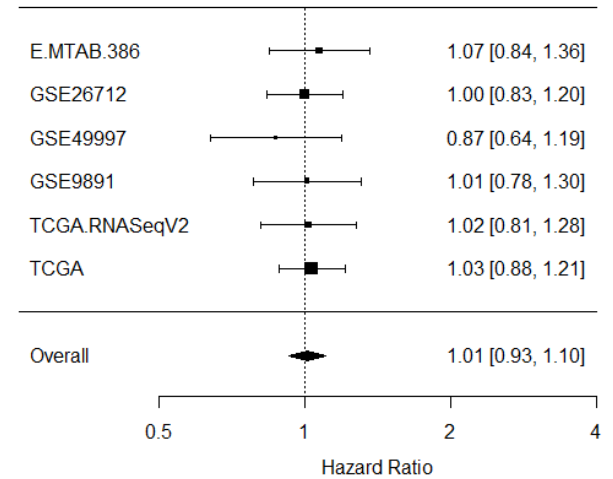

Pval: 0.8062681



# KLF16

## Univariate

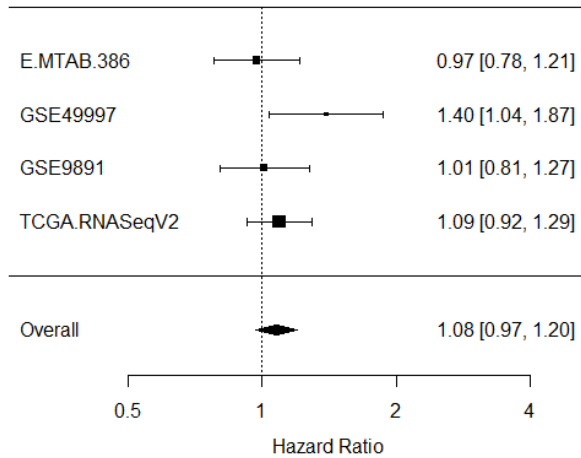

Pval: 0.164804

## Multivariate (age, FIGO stage, residual tumour)

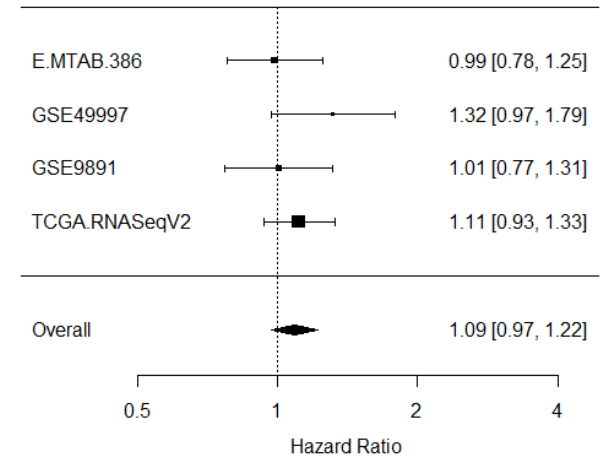

Pval: 0.1576571

# KLF17

## Univariate

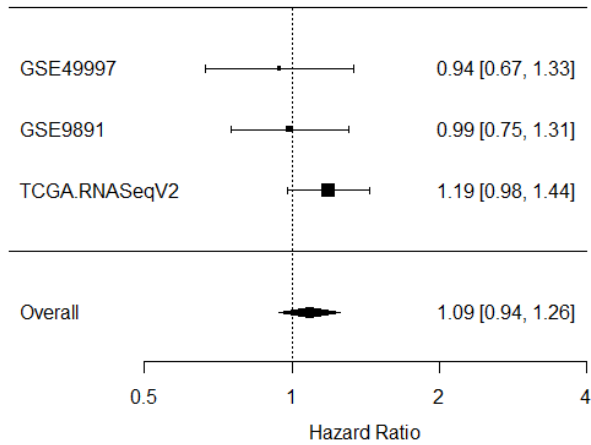

Pval: 0.2474039

## Multivariate (age, FIGO stage, residual tumour)

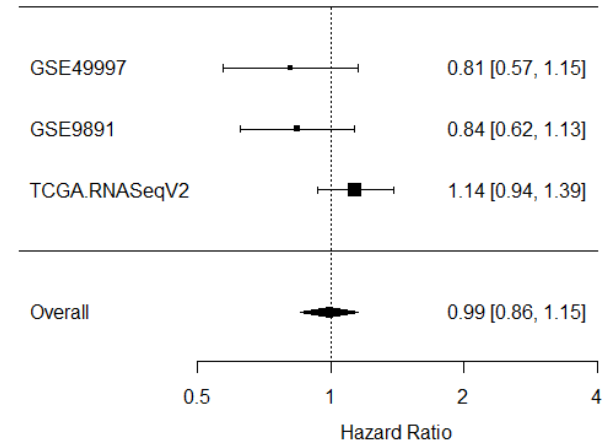

Pval: 0.9410717
